# Supplementary material
Source: Springer Nature journal article supplement (https://www.springermedizin.de/resource/supplementary/12885_2013_3949_MOESM2_ESM.pdf/9464818)
Supplement: MOESM2 [file 9464818]

|                   |      | Year of follow-up   |      |      |      |      |      |      |      |      |      |                 |      |      |      |      |      |      |      |      |      |    |
|-------------------|------|---------------------|------|------|------|------|------|------|------|------|------|-----------------|------|------|------|------|------|------|------|------|------|----|
|                   |      | 1990                | 1991 | 1992 | 1993 | 1994 | 1995 | 1996 | 1997 | 1998 | 1999 | 2000            | 2001 | 2002 | 2003 | 2004 | 2005 | 2006 | 2007 | 2008 | 2009 |    |
| Year of diagnosis | 1990 | 0                   | 1    | 2    | 3    | 4    | 5    | 6    | 7    | 8    | 9    | 10              |      |      |      |      |      |      |      |      |      |    |
|                   | 1991 |                     | 0    | 1    | 2    | 3    | 4    | 5    | 6    | 7    | 8    | 9               | 10   |      |      |      |      |      |      |      |      |    |
|                   | 1992 |                     |      | 0    | 1    | 2    | 3    | 4    | 5    | 6    | 7    | 8               | 9    | 10   |      |      |      |      |      |      |      |    |
|                   | 1993 |                     |      |      | 0    | 1    | 2    | 3    | 4    | 5    | 6    | 7               | 8    | 9    | 10   |      |      |      |      |      |      |    |
|                   | 1994 |                     |      |      |      | 0    | 1    | 2    | 3    | 4    | 5    | 6               | 7    | 8    | 9    | 10   |      |      |      |      |      |    |
|                   | 1995 |                     |      |      |      |      | 0    | 1    | 2    | 3    | 4    | 5               | 6    | 7    | 8    | 9    | 10   |      |      |      |      |    |
|                   | 1996 |                     |      |      |      |      |      | 0    | 1    | 2    | 3    | 4               | 5    | 6    | 7    | 8    | 9    | 10   |      |      |      |    |
|                   | 1997 |                     |      |      |      |      |      |      | 0    | 1    | 2    | 3               | 4    | 5    | 6    | 7    | 8    | 9    | 10   |      |      |    |
|                   | 1998 |                     |      |      |      |      |      |      |      | 0    | 1    | 2               | 3    | 4    | 5    | 6    | 7    | 8    | 9    | 10   |      |    |
|                   | 1999 | Conventional method |      |      |      |      |      |      |      |      |      | 0               | 1    | 2    | 3    | 4    | 5    | 6    | 7    | 8    | 9    | 10 |
| 2000              |      |                     |      |      |      |      |      |      |      |      |      | 0               | 1    | 2    | 3    | 4    | 5    |      |      |      |      |    |
| 2001              |      |                     |      |      |      |      |      |      |      |      |      |                 | 0    | 1    | 2    | 3    | 4    | 5    |      |      |      |    |
| 2002              |      |                     |      |      |      |      |      |      |      |      |      |                 |      | 0    | 1    | 2    | 3    | 4    | 5    |      |      |    |
| 2003              |      |                     |      |      |      |      |      |      |      |      |      |                 |      |      | 0    | 1    | 2    | 3    | 4    | 5    |      |    |
| 2004              |      |                     |      |      |      |      |      |      |      |      |      | Period approach |      |      | 0    | 1    | 2    | 3    | 4    | 5    |      |    |
